# Supplementary material for: Biosourced 1,2,3-triazolium ionic liquids derived from isosorbide
Source: Royal Society of Chemistry journal article supplement (doi:10.1039/c5nj02660a), 2015-11-16
Supplement: c5nj02660a1.pdf [file c5nj02660a1.pdf]

## Biosourced 1,2,3-Triazolium Chiral Ionic Liquids derived from Isosorbide

Malek M'sahel,<sup>a,b,c</sup> Mona Marie Obadia,<sup>a</sup> Raouf Medimagh,<sup>\*b</sup> Anatoli Serghei,<sup>a</sup> Mongia Said

Zina<sup>c</sup> and Eric Drockenmuller<sup>\*a</sup>

<sup>a</sup> Laboratoire d'Ingénierie des Matériaux Polymères (UMR CNRS 5223), Université Claude Bernard Lyon 1, 15 Boulevard Latarjet, 69622 Villeurbanne Cedex (France)

<sup>b</sup> Laboratoire des substances naturelles (LR10INRAP02), Institut National de Recherche et d'Analyse Physico-chimique, Sidi Thabet Biotechpole, 2020 Ariana, (Tunisia)

<sup>c</sup> Faculté des Sciences de Tunis El Manar, 2092 Tunis (Tunisia)

Corresponding author e-mail: [raouf.medimagh@inrap.rnrt.tn](mailto:raouf.medimagh@inrap.rnrt.tn); [eric.drockenmuller@univ-lyon1.fr](mailto:eric.drockenmuller@univ-lyon1.fr)

### Supporting information (New Journal of Chemistry)

**Table S1.** Solubility of 1,2,3-triazolium-Based Ionic Liquids **17-24** and their 1,2,3-triazole precursors **15,16**

| Entry     | H <sub>2</sub> O | Hexane | MeOH | EtOAc | Acetone | Et <sub>2</sub> O | THF | CH <sub>2</sub> Cl <sub>2</sub> | CHCl <sub>3</sub> | CH <sub>3</sub> CN | PhCH <sub>3</sub> | DMF | DMSO |
|-----------|------------------|--------|------|-------|---------|-------------------|-----|---------------------------------|-------------------|--------------------|-------------------|-----|------|
| <b>15</b> | ++               | -      | ++   | ++    | ++      | -                 | ++  | ++                              | ++                | ++                 | -                 | ++  | ++   |
| <b>16</b> | ++               | -      | ++   | ++    | ++      | -                 | ++  | ++                              | ++                | ++                 | -                 | ++  | ++   |
| <b>17</b> | ++               | -      | ++   | ~     | ++      | -                 | -   | ++                              | ++                | ++                 | -                 | ++  | ++   |
| <b>18</b> | ++               | -      | ++   | ~     | ++      | -                 | -   | ++                              | ++                | ++                 | -                 | ++  | ++   |
| <b>19</b> | ++               | -      | ++   | -     | ++      | -                 | -   | ++                              | ++                | ++                 | -                 | ++  | ++   |
| <b>20</b> | ++               | -      | ++   | -     | ++      | -                 | -   | ++                              | ++                | ++                 | -                 | ++  | ++   |
| <b>21</b> | ++               | -      | ++   | -     | ++      | -                 | -   | ++                              | ++                | ++                 | -                 | ++  | ++   |
| <b>22</b> | ++               | -      | ++   | -     | ++      | -                 | -   | ++                              | ++                | ++                 | -                 | ++  | ++   |
| <b>23</b> | ++               | -      | ++   | -     | ++      | -                 | -   | ++                              | ++                | ++                 | -                 | ++  | ++   |
| <b>24</b> | ++               | -      | ++   | -     | ++      | -                 | -   | ++                              | ++                | ++                 | -                 | ++  | ++   |

“++” indicates solubility at 10 mg.mL<sup>-1</sup>, “+” indicates solubility at 1 mg.mL<sup>-1</sup>, “~” indicates partial solubility at 0.1 mg.mL<sup>-1</sup>, while “-” indicates no detectable solubility even at 0.1 mg.mL<sup>-1</sup>.

| Entry    | 15                 | 16                 | 17                  | 18                  | 19                                 | 20                                 | 21                                  | 22                                 | 23                                 | 24                                  |
|----------|--------------------|--------------------|---------------------|---------------------|------------------------------------|------------------------------------|-------------------------------------|------------------------------------|------------------------------------|-------------------------------------|
| fragment | [M+H] <sup>+</sup> | [M+H] <sup>+</sup> | [M+2I] <sup>-</sup> | [M+2I] <sup>-</sup> | [M+2BF <sub>4</sub> ] <sup>-</sup> | [M+2PF <sub>6</sub> ] <sup>-</sup> | [M+2NTf <sub>2</sub> ] <sup>-</sup> | [M+2BF <sub>4</sub> ] <sup>-</sup> | [M+2PF <sub>6</sub> ] <sup>-</sup> | [M+2NTf <sub>2</sub> ] <sup>-</sup> |
| Calcd    | 240.1343           | 240.1343           | 507.9600            | 507.9600            | 428.1573                           | 544.0794                           | 813.9856                            | 428.1573                           | 544.0794                           | 813.9856                            |
| Found    | 240.1335           | 240.1340           | 507.9605            | 507.9604            | 428.1570                           | 544.0802                           | 813.9858                            | 428.1579                           | 544.0797                           | 813.9861                            |

[a] negative mode ESI-HRMS [M+2X]<sup>-</sup>; [b] positive mode ESI-HRMS [M+H]<sup>+</sup>.

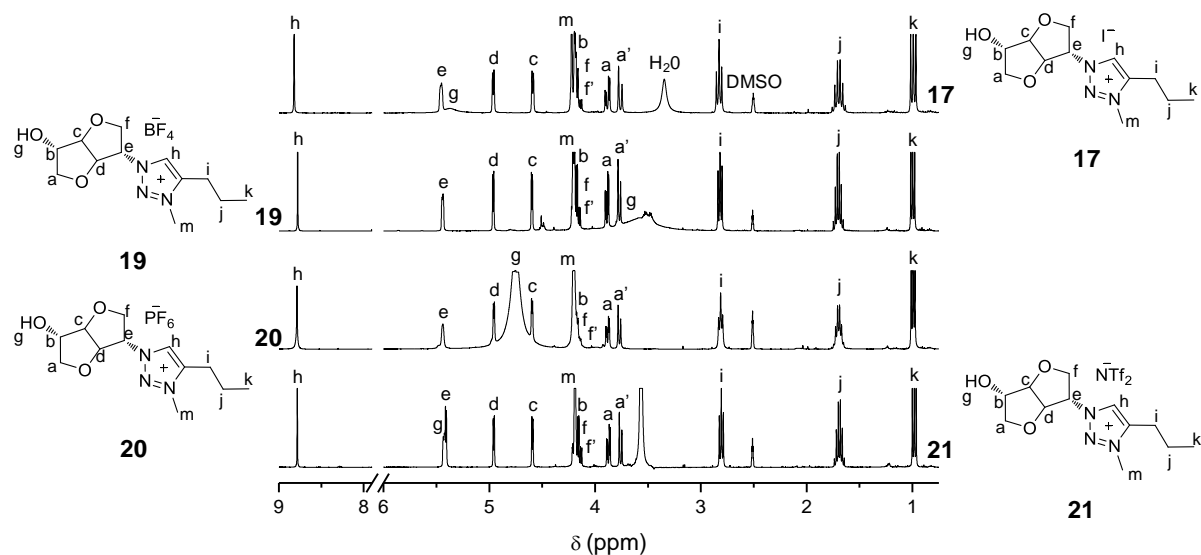

Figure S1. <sup>1</sup>H NMR (DMSO-*d*<sub>6</sub>, 25 °C) of biosourced 1,2,3-triazoliums **17**, **19**-**21**.

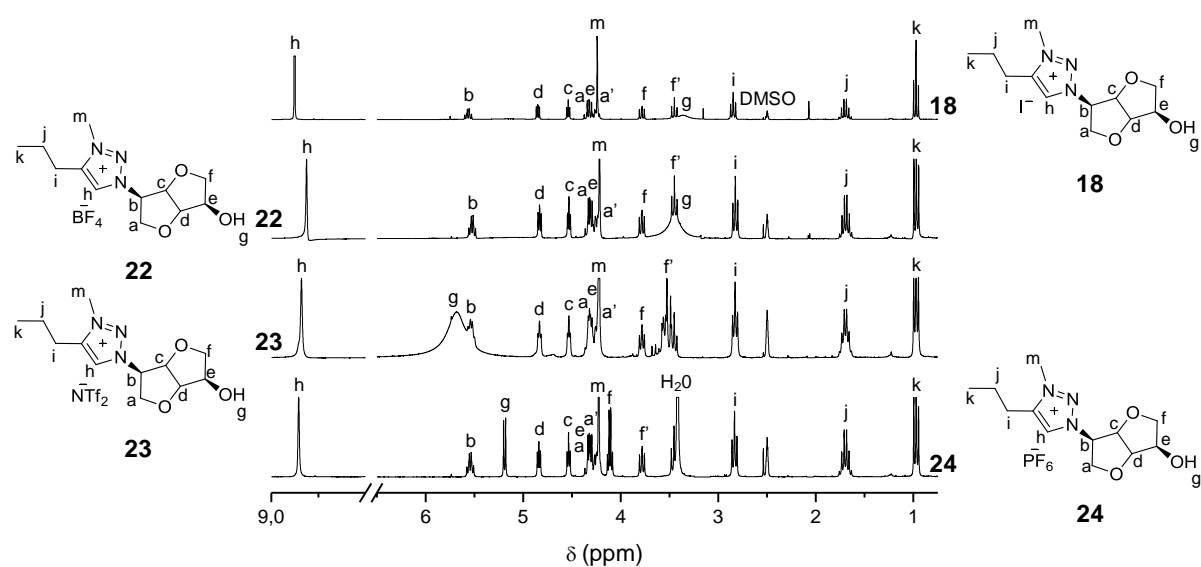

Figure S2. <sup>1</sup>H NMR (DMSO-*d*<sub>6</sub>, 25 °C) of biosourced 1,2,3-triazoliums **18**, **22**-**24**.

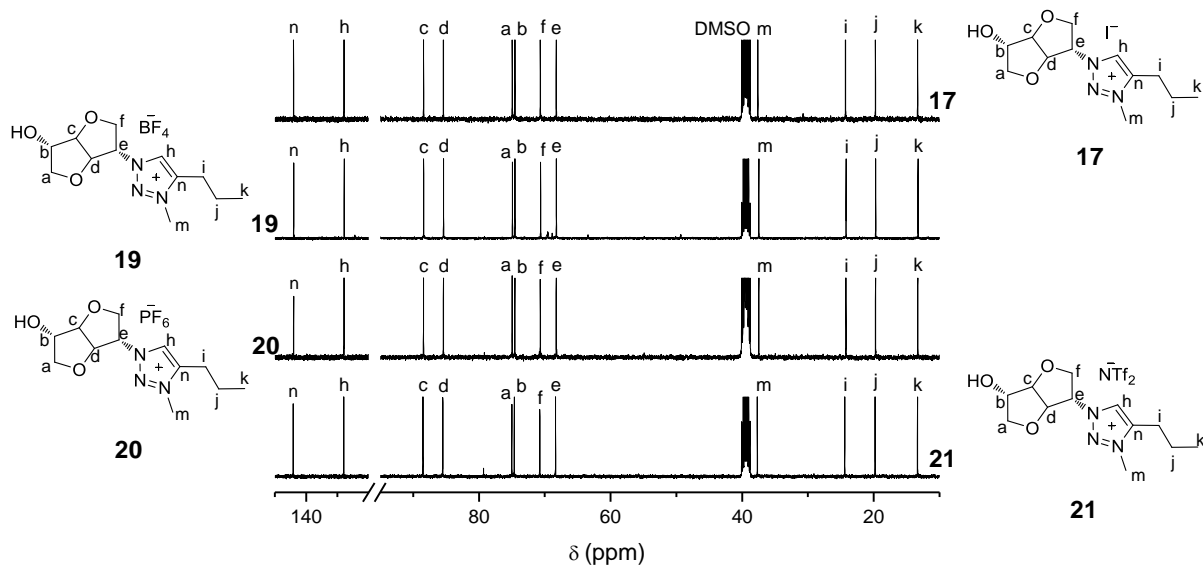

**Figure S3.**  $^{13}\text{C}$  NMR (DMSO- $d_6$ , 25 °C) of biosourced 1,2,3-triazoliums **17**, **19**-**21**.

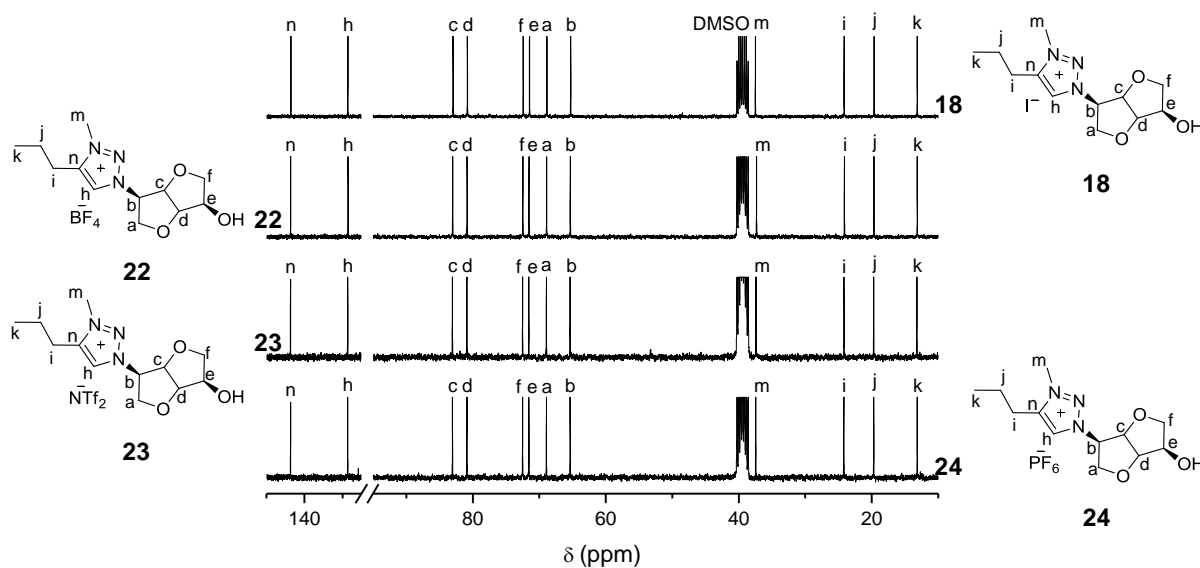

**Figure S4.**  $^{13}\text{C}$  NMR (DMSO- $d_6$ , 25 °C) of biosourced 1,2,3-triazoliums **18**, **22**-**24**.

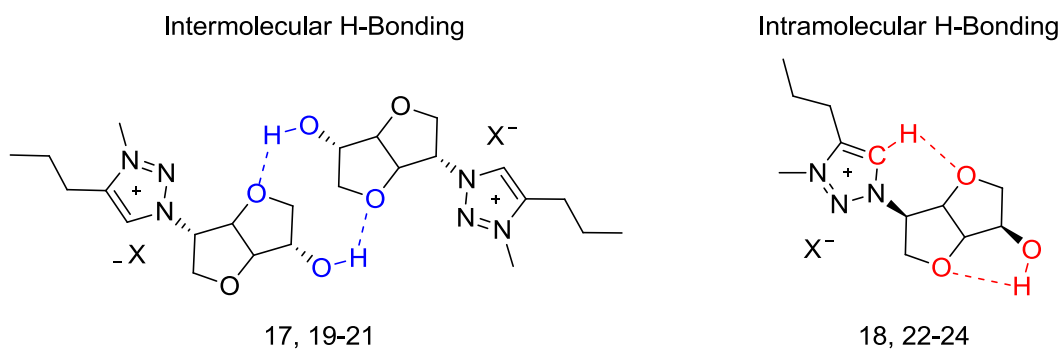

**Scheme S1.** Difference in *H*-bonding between the isoidide (**17,19-21**) and isomannide (**18,22-24**) series.
